# Supplementary material for: Documenting an epidemic of suffering: low health-related quality of life among transgender youth
Source: Springer Nature journal article supplement (doi:10.1007/s11136-018-1839-y), 2018-03-21
Supplement: MOESM2 [file 15555234]

**Online Supplement**

**Documenting an epidemic of suffering: Low health-related quality of life among transgender and gender nonconforming youth**

Yuanshu Zou, PhD, Rhonda Szczesniak, PhD, Alexis Teeters, Lee Ann E. Conard, DO, & Daniel H. Grossoehme, DMin

Agreement Analysis Methods:

In each plot below, the mean of the difference and the upper and lower limits of agreement (LOA) were determined. Bias was estimated as the mean difference between the self-reported and parent proxy for each scale, and each plot includes corresponding 95% LOA. Extent of agreement was determined by whether the difference is statistically significant or systematic bias was illustrated in plots. In each plot, the black solid line indicates the mean difference (self-proxy); black error bar indicates 95% CI of the mean of the differences; grey dashed lines indicate 95% LOA and the dotted black line indicates equality.

Figure S1. Bland-Altman plot for PedsQL Total Score

Figure S2. Bland-Altman plot for PedsQL Physical Health score

Figure S3. Bland-Altman plot for PedsQL Psychosocial Health score

Figure S4. Bland-Altman plot for PedsQL Emotional functioning score

Figure S5. Bland-Altman Plot for PedsQL Social functioning score

Figure S6. Bland-Altman plot for PedsQL School functioning score
